# Supplementary material for: Simultaneous Determination of Ferulic Acid and Vanillin in Vanilla Extracts Using Voltammetric Sensor Based on Electropolymerized Bromocresol Purple
Source: MDPI journal article supplement (doi:10.3390/s22010288), 2021-12-31
Supplement: s1 [file s1]

## Supplementary Materials

### Simultaneous Determination of Ferulic Acid and Vanillin in Vanilla Extracts Using Voltammetric Sensor Based on the Electropolymerized Bromocresol Purple

Guzel Ziyatdinova, Anastasiya Zhupanova and Rustam Davletshin

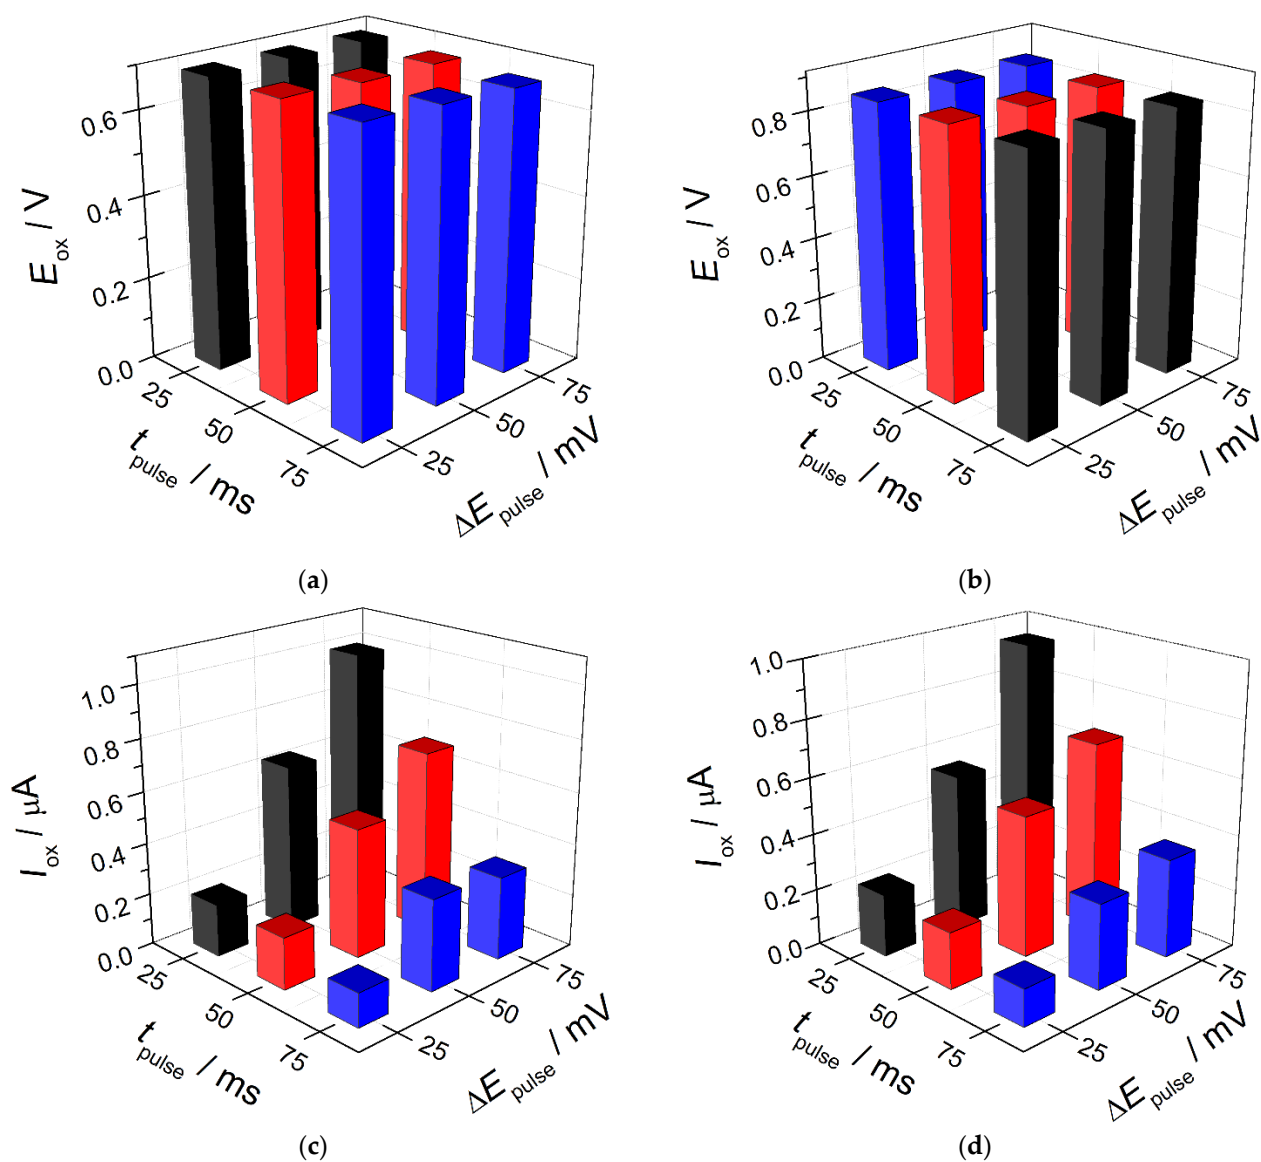

**Figure S1.** Effect of pulse parameters on the oxidation potentials (a and b) and oxidation currents (c and d) of 5.0  $\mu\text{M}$  mixture of ferulic acid (a, c) and vanillin (b) at the polyBCP/f-SWCNTs/GCE in BRB pH 2.0.

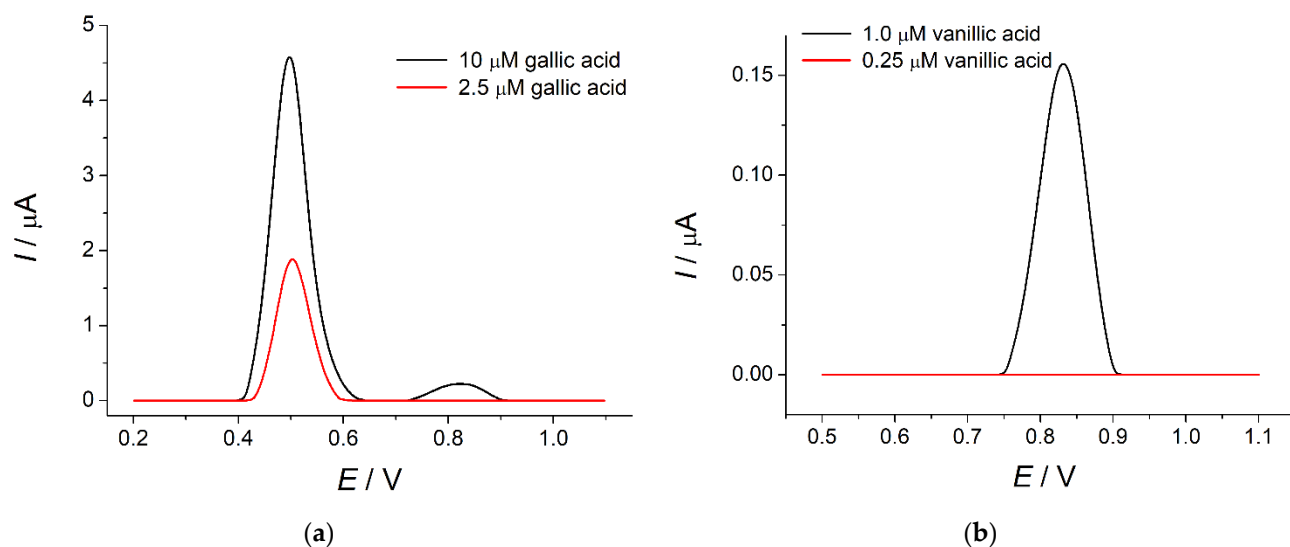

**Figure S2.** (a) Baseline-corrected DPV of 10 and 2.5  $\mu\text{M}$  gallic acid at the polyBCP/f-SWCNTs/GCE in BRB pH 2.0; (b) Baseline-corrected DPV of 1.0 and 0.25  $\mu\text{M}$  vanillic acid at the polyBCP/f-SWCNTs/GCE in BRB pH 2.0.  $\Delta E_{\text{pulse}} = 75 \text{ mV}$ ,  $t_{\text{pulse}} = 25 \text{ ms}$ ,  $\nu = 10 \text{ mV s}^{-1}$ .

**Table S1.** Recovery of ferulic acid and vanillin in *Vanilla planifolia* extract ( $n = 5$ ;  $P = 0.95$ ).

| Analyte      | Spiked/ $\mu\text{M}$ | Found/ $\mu\text{M}$ | RSD/% | R/%  |
|--------------|-----------------------|----------------------|-------|------|
| Ferulic acid | 0                     | 0                    | -     | -    |
|              | 0.50                  | $0.50 \pm 0.01$      | 2.0   | 100  |
|              | 1.0                   | $1.00 \pm 0.03$      | 2.8   | 100  |
| Vanillin     | 0                     | $1.67 \pm 0.06$      | 1.5   | -    |
|              | 0.83                  | $2.49 \pm 0.04$      | 1.2   | 99.6 |
|              | 1.67                  | $3.34 \pm 0.09$      | 1.1   | 100  |
